# Supplementary material for: Topical TLR7 Agonist Imiquimod Can Induce Immune-Mediated Rejection of Skin Metastases in Patients with Breast Cancer
Source: Oxford University Press journal article supplement (doi:10.1158/1078-0432.ccr-12-1149), 2012-07-06
Supplement: 10780432ccr121149-sup-tab1.xls [file 10780432ccr121149-sup-tab1.xls]

## Sheet: Sheet1
ID	Age	Menopausal state	Pathology	HR	Her2	Grade	Presentation	Extracutaneous metastases	Prior therapy	Concurrent therapy	AEs (maximum grade)	ROI change	Response
1	50	Postmenopausal	IDC	pos	pos	III	Chest wall recurrence	Lung	H, C, Her2T, RT, S	C, Her2T	local (2)	0.57	SD
2	44	Premenopausal	IDC	neg	neg	III	Chest wall recurrence	Pleura	V, C, HT, I, RT, S	none	systemic (2)	0.53	SD
3	49	Postmenopausal	IDC	pos	pos	III	Chest wall recurrence	None	V, C, Her2T, H, RT, S	none	local (1), systemic (2)	1.13	PD (new skin lesions)
4	57	Postmenopausal	IDC	pos	neg	III	Chest wall recurrence	LN	V, C, H, HT, I	none	local (1), systemic (1)	0.83	SD
5	50	Postmenopausal	IDC	pos	pos	III	Skin involvement by primary tumor	Adrenal	C, Her2T, H, RT	H, Her2T	local (2), systemic (1)	0.65	SD
6	49	Premenopausal	IDC	pos	neg	II	Skin involvement by primary tumor	Lung, Bone	V, C, H	H	none	0.77	SD
7	57	Postmenopausal	IDC	pos	pos	III	Skin involvement by primary tumor	Bone	H, Her2T	H, Her2T	local (1)	1.14	NR
8	71	Postmenopausal	IDC	pos	neg	III	Chest wall recurrence	Bone, LN	H	H	none	0.29	PR (responder 1)
9	59	Postmenopausal	ILC	pos	pos	II	Chest wall recurrence	Bone, LN	H, Her2T, RT, S	H, Her2T	local (1)	0.4	PR (responder 2)
10	45	Postmenopausal	IDC	neg	pos	III	Chest wall recurrence	None	C, Her2T	C, Her2T	local (1)	1.18	PD (new skin lesions)
